# Supplementary material
Source: MDPI journal article supplement (https://www.mdpi.com/2311-5629/9/1/24)
Supplement: s1 [file s1]

Archive with 1 entries (1 files):
- carbon-2141814-supplementary.pdf
